# Supplementary material for: The Effect of Long-Term Aronia melanocarpa Extract Supplementation on Cognitive Performance, Mood, and Vascular Function: A Randomized Controlled Trial in Healthy, Middle-Aged Individuals
Source: MDPI journal article supplement (doi:10.3390/nu12082475), 2020-08-17
Supplement: s1 [file s1]

## Supplementary Materials

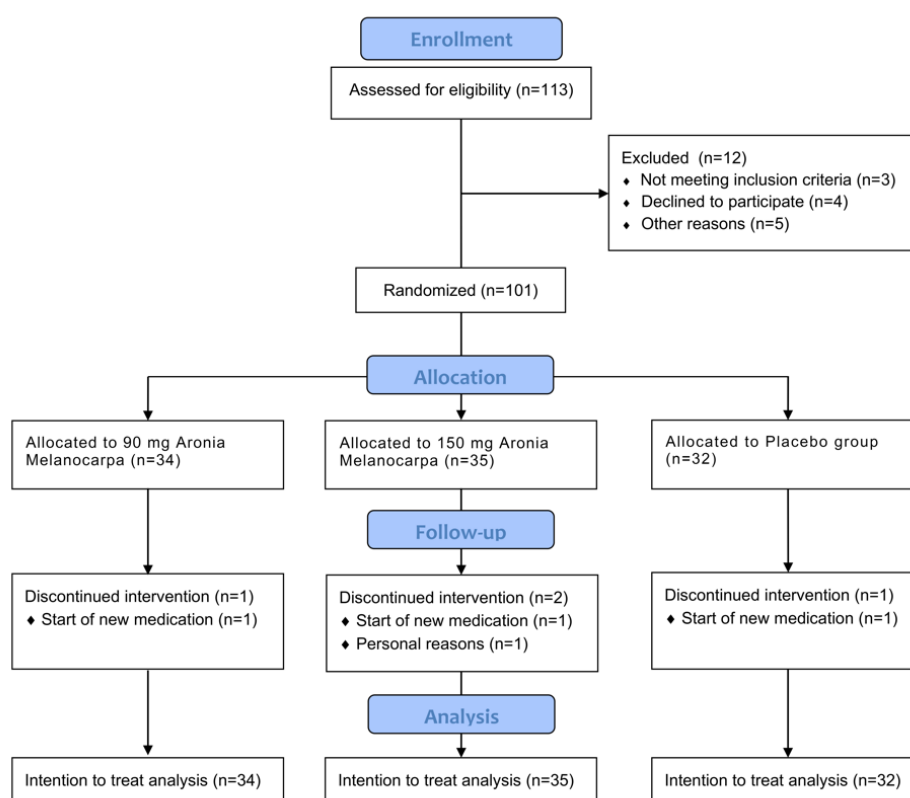

**Figure S1.** Consort flow diagram of study

**Table S1.** The effect of *Aronia melanocarpa* extract (AME) supplementation on ALT, ALP, bilirubin, and GGT as markers for liver function<sup>†</sup>.

| Variable<br>(Reference)        | 90 mg<br>Aronia<br>(n=34) | 150 mg<br>Aronia<br>(n=35) | Placebo<br>(n=32) | Main<br>effect of<br>treatment |
|--------------------------------|---------------------------|----------------------------|-------------------|--------------------------------|
| <b>ALT (7-56 U/L)</b>          |                           |                            |                   | 0.883                          |
| Baseline                       | 30.2 ± 2.7                | 24.0 ± 1.6                 | 26.1 ± 2.6        |                                |
| 24 weeks                       | 29.2 ± 2.1                | 24.5 ± 2.1                 | 27.0 ± 3.0        |                                |
| <b>ALP (41-133 U/L)</b>        |                           |                            |                   | 0.878                          |
| Baseline                       | 73.4 ± 4.0                | 73.9 ± 3.2                 | 79.0 ± 3.1        |                                |
| 24 weeks                       | 73.5 ± 4.1                | 70.3 ± 2.6                 | 78.3 ± 3.2        |                                |
| <b>Bilirubin (2-21 µmol/L)</b> |                           |                            |                   | 0.125                          |
| Baseline                       | 9.2 ± 0.8                 | 11.0 ± 1.4                 | 8.6 ± 0.6         |                                |
| 24 weeks                       | 9.8 ± 0.9                 | 9.1 ± 0.7                  | 8.7 ± 0.7         |                                |
| <b>GGT (9-85 U/L)</b>          |                           |                            |                   | 0.950                          |
| Baseline                       | 27.0 ± 4.0                | 27.4 ± 4.3                 | 34.3 ± 10.1       |                                |
| 24 weeks                       | 29.7 ± 3.2                | 26.8 ± 4.3                 | 32.7 ± 6.5        |                                |

<sup>1</sup>Data are presented as actual mean  $\pm$  SEM. Analysis was performed with a linear mixed model containing treatment as a fixed factor, with correction for baseline values. Reference concentrations are added in brackets [29]. Lower scores indicate improved liver function. ALT: alanine aminotransferase; ALP: alkaline phosphatase; GGT: gamma-glutamyl transferase.

**Table S2.** The effect of *Aronia melanocarpa* extract (AME) supplementation on central systolic and diastolic blood pressure and maximal intima media thickness in each study group<sup>1</sup>.

|                                                  | 90 mg<br>Aronia<br>(n=34) | 150 mg<br>Aronia<br>(n=35) | Placebo<br>(n=32) | Time*treatment<br>interaction | Main<br>effect<br>of time | Main<br>effect of<br>treatment |
|--------------------------------------------------|---------------------------|----------------------------|-------------------|-------------------------------|---------------------------|--------------------------------|
| <b>Mean Central<br/>Systolic BP (mm<br/>Hg)</b>  |                           |                            |                   | 0.871 <sup>a</sup>            | 0.393 <sup>b</sup>        | 0.891 <sup>b</sup>             |
| Baseline                                         | 136.9 ± 2.7               | 135.7 ± 1.9                | 137.9 ± 2.5       |                               |                           |                                |
| 6 weeks                                          | 135.5 ± 2.4               | 135.8 ± 1.8                | 136.6 ± 1.9       |                               |                           |                                |
| 12 weeks                                         | 136.6 ± 2.4               | 136.1 ± 1.7                | 135.0 ± 2.0       |                               |                           |                                |
| 24 weeks                                         | 136.1 ± 2.5               | 134.0 ± 1.9                | 134.0 ± 2.1       |                               |                           |                                |
| <b>Mean Central<br/>Diastolic BP (mm<br/>Hg)</b> |                           |                            |                   | 0.580 <sup>a</sup>            | 0.479 <sup>b</sup>        | 0.144 <sup>b</sup>             |
| Baseline                                         | 76.3 ± 1.1                | 75.3 ± 1.1                 | 75.8 ± 1.1        |                               |                           |                                |
| 6 weeks                                          | 76.0 ± 0.9                | 74.9 ± 1.0                 | 76.4 ± 1.1        |                               |                           |                                |
| 12 weeks                                         | 76.6 ± 1.1                | 74.3 ± 1.1                 | 75.0 ± 1.2        |                               |                           |                                |
| 24 weeks                                         | 76.2 ± 1.0                | 74.9 ± 1.0                 | 75.2 ± 1.2        |                               |                           |                                |
| <b>max cIMT (mm)</b>                             |                           |                            |                   | 0.786 <sup>a</sup>            | 0.928 <sup>b</sup>        | 0.301 <sup>b</sup>             |
| Baseline                                         | 0.81 ± 0.02               | 0.80 ± 0.02                | 0.81 ± 0.02       |                               |                           |                                |
| 6 weeks                                          | 0.78 ± 0.02               | 0.81 ± 0.01                | 0.80 ± 0.02       |                               |                           |                                |
| 12 weeks                                         | 0.80 ± 0.02               | 0.81 ± 0.02                | 0.79 ± 0.02       |                               |                           |                                |
| 24 weeks                                         | 0.79 ± 0.02               | 0.81 ± 0.02                | 0.80 ± 0.02       |                               |                           |                                |

<sup>1</sup>Data are presented as actual mean ± SEM. Analysis was performed with a linear mixed model using estimated means, with correction for baseline values. <sup>a</sup> p-values originate from the linear mixed model with a time\*treatment interaction. <sup>b</sup> p-values originate from the linear mixed model without a time\*treatment interaction. cIMT: carotid intima media thickness.
